# Supplementary material for: Genotypic and Phenotypic Characterization of Pathogenic Escherichia coli, Salmonella spp., and Campylobacter spp., in Free-Living Birds in Mainland Portugal
Source: MDPI journal article supplement (doi:10.3390/ijerph20010223), 2022-12-23
Supplement: s1 [file s1]

| Isolate ID     | Year | Animal                         | Pathotype | AMR phenotype                                              | Serotype  | Virulence genes                                                                                                                                                                               | Resistance genes                                                                                                                 | Plasmids                                       | MLST    | Sample ID | ENA run Accession |
|----------------|------|--------------------------------|-----------|------------------------------------------------------------|-----------|-----------------------------------------------------------------------------------------------------------------------------------------------------------------------------------------------|----------------------------------------------------------------------------------------------------------------------------------|------------------------------------------------|---------|-----------|-------------------|
| <i>E. coli</i> |      |                                |           |                                                            |           |                                                                                                                                                                                               |                                                                                                                                  |                                                |         |           |                   |
| Ec-PBG33       | 2021 | <i>Columba livia</i>           | STEC      | SMX, TET, TMP                                              | O45:H2    | <i>astA , cba , cif , cma , eae , espA , espB , espF , gad , hra , iss , nleA , nleB , nleC , ompT , stx2f , terC , traT</i>                                                                  | <i>sul1 , tet(A) , dfrA1</i>                                                                                                     | IncFIB, IncFII, IncI1-I                        | ST20    | PT_EC0069 | ERR9955189        |
| EC-PBG48       | 2021 | <i>Larus spp.</i>              | EPEC      | Susceptible                                                | O125ac:H6 | <i>chuA , cif , eae , espA , espC , gad , ibeA , nleB , ompT , terC , tir , yjcV</i>                                                                                                          | Not found                                                                                                                        | Not found                                      | ST583   | PT_EC0070 | ERR9955019        |
| EC-EVOA41      | 2020 | <i>Acrocephalus scirpaceus</i> | ExPEC     | AMP, CHL, CIP, TET                                         | O101:H9   | <i>astA , cea , gad , iss , terC , traT</i>                                                                                                                                                   | <i>blaTEM-1B , cmlA1 , qnrB19 , qnrB56 , qnrB67 , qnrB82 , tet(A)</i>                                                            | Col, Col8282, IncFII, IncX1                    | ST10    | PT_EC0061 | ERR9954999        |
| EC-EVOA45      | 2020 | <i>Acrocephalus scirpaceus</i> | ExPEC     | AMP, CHL, CIP, TET                                         | O101:H9   | <i>astA , cea , gad , iss , terC , traT</i>                                                                                                                                                   | <i>blaTEM-1B , cmlA1 , qnrB19 , qnrB56 , qnrB67 , qnrB82 , tet(A)</i>                                                            | Col, Col8282, IncFII, IncX1                    | ST10    | PT_EC0062 | ERR9955144        |
| EC-EVOA54      | 2020 | <i>Gallinula chloropus</i>     | ExPEC     | AMP, CHL, CIP, TET                                         | O101:H9   | <i>astA , cea , gad , iss , terC , traT</i>                                                                                                                                                   | <i>blaTEM-1B , cmlA1 , qnrB19 , qnrB56 , qnrB67 , qnrB82 , tet(A)</i>                                                            | Col, Col8282, IncFII, IncX1                    | ST10    | PT_EC0063 | ERR9954977        |
| EC-EVOA55      | 2020 | <i>Gallinula chloropus</i>     | EAEC      | Susceptible                                                | O92:H33   | <i>aaiC , aap , aar , aggA , aggB , aggC , aggD , aggR , fyuA , gad , iha , irp2 , iss , iucC , iutA , mchB , mchC , mchF , ORF3 , ORF4 , pic , sat , terC</i>                                | Not found                                                                                                                        | IncFIB                                         | ST34    | PT_EC0064 | ERR9954980        |
| EC-E60         | 2020 | <i>Anas crecca</i>             | STEC      | Susceptible                                                | O105:H7   | <i>vtx2f , eae , espA , espF , gad , iss , lpfA , nleA , nleB , nleC , ompT , terC , tir , traT</i>                                                                                           | Not found                                                                                                                        | IncFIB                                         | ST13581 | PT_EC0065 | ERR9955121        |
| Ec-P2-I        | 2020 | <i>Larus spp.</i>              | ExPEC     | AMP, CAZ, CIP, COX, FEP, NAL, SMX, TET, TMP                | O55:H10   | <i>cvaC , etsC , fyuA , gad , hlyF , iron , irp2 , iss , iucC , iutA , lpfA , mchF , ompT , papC , sitA , terC , traT</i>                                                                     | <i>blaTEM-1B , blaSHV-12 , qnrB19 , gyrA , sul2 , tet(B) , dfrA17</i>                                                            | IncFIB, IncFIC, IncI1-I                        | ST162   | PT_EC0054 | ERR9955128        |
| Ec-P4-I        | 2020 | <i>Larus spp.</i>              | ExPEC     | AMP, CAZ, CIP, COX, FEP, NAL, SMX, TET, TMP                | OND:H16   | <i>cma , cvaC , etsC , fyuA , gad , hlyF , iron , irp2 , iss , iucC , iutA , kpsE , lpfA , mchF , ompT , papC , sitA , terC , traT</i>                                                        | <i>blaTEM-1B , blaSHV-12 , gyrA , sul2 , tet(B) , dfrA14</i>                                                                     | Col440II, IncFIB, IncFII, IncI1-I              | ST453   | PT_EC0055 | ERR9955188        |
| Ec-P6-I        | 2020 | <i>Larus spp.</i>              | ExPEC     | AMC, AMP, AZM, CAZ, CIP, COX, FEP, NAL, SMX, TET, TMP      | OND:H9    | <i>fyuA , gad , irp2 , iucC , iutA , lpfA , senB , sitA , terC</i>                                                                                                                            | <i>blaCTX-M-15 , blaTEM-1A , blaOXA-1 , mph(A) , aac(6')-Ib-cr , gyrA , sul1 , sul2 , tet(A) , dfrA17</i>                        | Col156, IncFIA, IncFIB, IncFII, IncI1-I, IncX4 | ST410   | PT_EC0056 | ERR9955089        |
| Ec-P16-I       | 2020 | <i>Larus spp.</i>              | ExPEC     | AMP, CAZ, CIP, COX, FEP, NAL, SMX, TET                     | O78:H4    | <i>cia , cib , cvaC , etsC , fyuA , gad , hlyF , hra , iha , iron , irp2 , iss , iucC , iutA , lpfA , mchB , mchC , mchF , ompT , sitA , terC , tsh</i>                                       | <i>blaCTX-M-1 , gyrA , sul2 , tet(A)</i>                                                                                         | IncFIB, IncFIC, IncI1-I                        | ST23    | PT_EC0057 | ERR9955175        |
| Ec-P17-I       | 2020 | <i>Larus spp.</i>              | EAEC      | AMC, AMP, CAZ, COX, FOX                                    | O111:H21  | <i>aaiC , aap , aar , afaD , agg3C , agg3D , agg5A , aggR , astA , espi , fyuA , gad , iha , iron , irp2 , iss , iucC , iutA , lpfA , ompT , ORF3 , ORF4 , pic , sat , sepA , terC , traT</i> | <i>ampC -promoter , blaTEM-1B</i>                                                                                                | IncB/O/K/Z, IncFIB, IncFII                     | ST40    | PT_EC0058 | ERR9955174        |
| Ec-P21-I       | 2020 | <i>Larus spp.</i>              | ExPEC     | AMC, AMP, AZM, CAZ, CIP, COX, FEP, GMN, NAL, SMX, TET, TMP | O25:H4    | <i>chuA , cnf1 , fyuA , gad , hra , iha , irp2 , iss , iucC , iutA , kpsE , kpsMII_K5 , mcbA , ompT , papA_F43 , papC , sat , senB , sitA , terC , traT , yjcV</i>                            | <i>blaCTX-M-15 , blaSHV-55 , blaOXA-1 , mph(A) , aac(6')-Ib-cr , aac(3)-IIa , gyrA , qnrS1 , sul1 , tet(A) , dfrA14 , dfrA17</i> | IncFIA, IncFII, IncN                           | ST131   | PT_EC0059 | ERR9955023        |
| Ec-P22-I       | 2020 | <i>Larus spp.</i>              | ExPEC     | AMC, AMP, AZM, CAZ, CIP, COX, FEP, GMN, NAL, SMX, TET, TMP | O25:H4    | <i>chuA , fyuA , gad , iha , irp2 , iss , iucC , iutA , kpsE , kpsMII_K5 , ompT , papA_F43 , sat , sitA , terC , traT , yjcV</i>                                                              | <i>blaCTX-M-15 , blaSHV-55 , blaOXA-1 , mph(A) , aac(6')-Ib-cr , aac(3)-IIa , gyrA , qnrS1 , sul1 , tet(A) , dfrA17</i>          | IncB/O/K/Z, IncFIA, IncFII, IncY               | ST131   | PT_EC0060 | ERR9955093        |

| Isolate ID                 | Year/Month | Animal                    | Serotype            | AMR phenotype | MLST   | Resistance genes   | Plasmids              | Sample ID | ENA run Accession |
|----------------------------|------------|---------------------------|---------------------|---------------|--------|--------------------|-----------------------|-----------|-------------------|
| <i>Salmonella enterica</i> |            |                           |                     |               |        |                    |                       |           |                   |
| Se-PBG3                    | 2020       | <i>Circaetus gallicus</i> | IIIB 60:k:e,n,x,z15 | Susceptible   | ST3127 | <i>aac(6')-Iaa</i> | Not found             | PT_SE0147 | ERR10115471       |
| Se-PBG10                   | 2020       | <i>Columba livia</i>      | Typhimurium         | Susceptible   | ST19   | <i>aac(6')-Iaa</i> | IncFIB, IncFII, IncX1 | PT_SE0148 | ERR10115475       |
| Se-PBG25                   | 2021       | <i>Columba livia</i>      | Litchfield          | Susceptible   | ST214  | <i>aac(6')-Iaa</i> | Not found             | PT_SE0165 | ERR10368807       |

| Isolate ID           | Year/Month | Animal                         | Species          | AMR phenotype | MLST    | Resistance genes                     | ENA run Accession |
|----------------------|------------|--------------------------------|------------------|---------------|---------|--------------------------------------|-------------------|
| <i>Campylobacter</i> |            |                                |                  |               |         |                                      |                   |
| Cc-EVOA24            | 2020       | <i>Acrocephalus scirpaceus</i> | <i>C. coli</i>   | Susceptible   | ST11400 | Not found                            | ERR10372412       |
| Cc-EVOA36            | 2020       | <i>Fulica atra</i>             | <i>C. coli</i>   | Susceptible   | ST11401 | Not found                            | ERR10372474       |
| Cj-EVOA54            | 2020       | <i>Gallinula chloropus</i>     | <i>C. jejuni</i> | AMP, CIP, TET | ST990   | <i>gyrA_T861 , tetO , blaOXA-466</i> | ERR10372605       |
| Cj-PBG16             | 2020       | <i>Larus spp.</i>              | <i>C. jejuni</i> | Susceptible   | ST1268  | Not found                            | ERR10372745       |
| Cj-PBG18             | 2020       | <i>Larus spp.</i>              | <i>C. jejuni</i> | Susceptible   | ST8572  | Not found                            | ERR10372542       |
